# Supplementary material
Source: PubMed Central journal article supplement (PMC2714872)
Supplement: NIHMS107905-supplement-1.pdf [file NIHMS107905-supplement-1.pdf]

Fig. S1

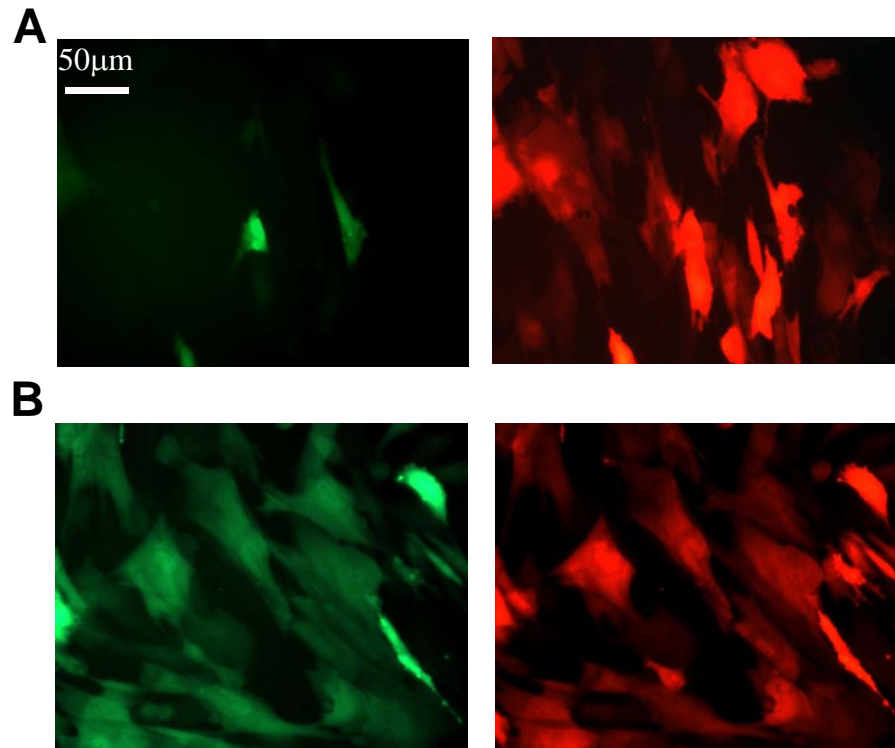

# Fig.S2

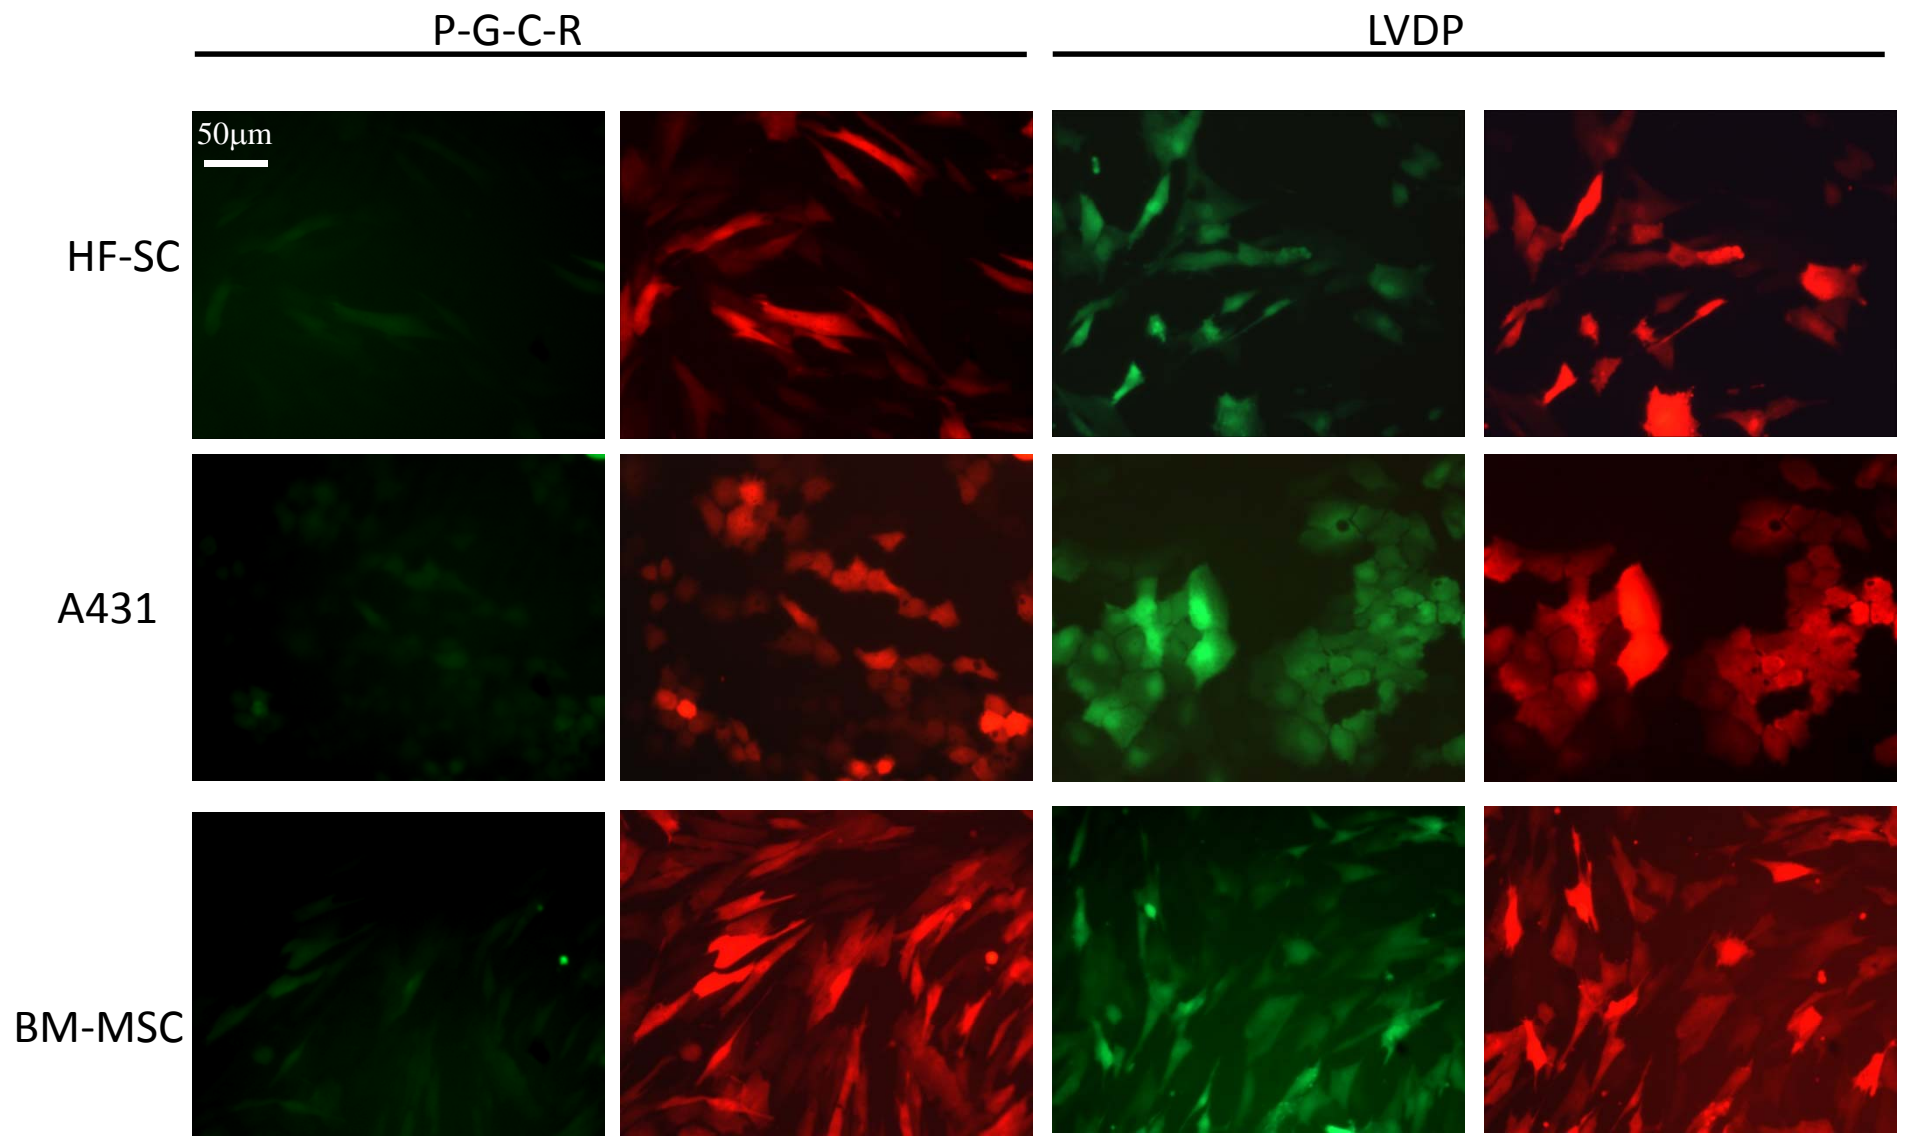

Fig.S3

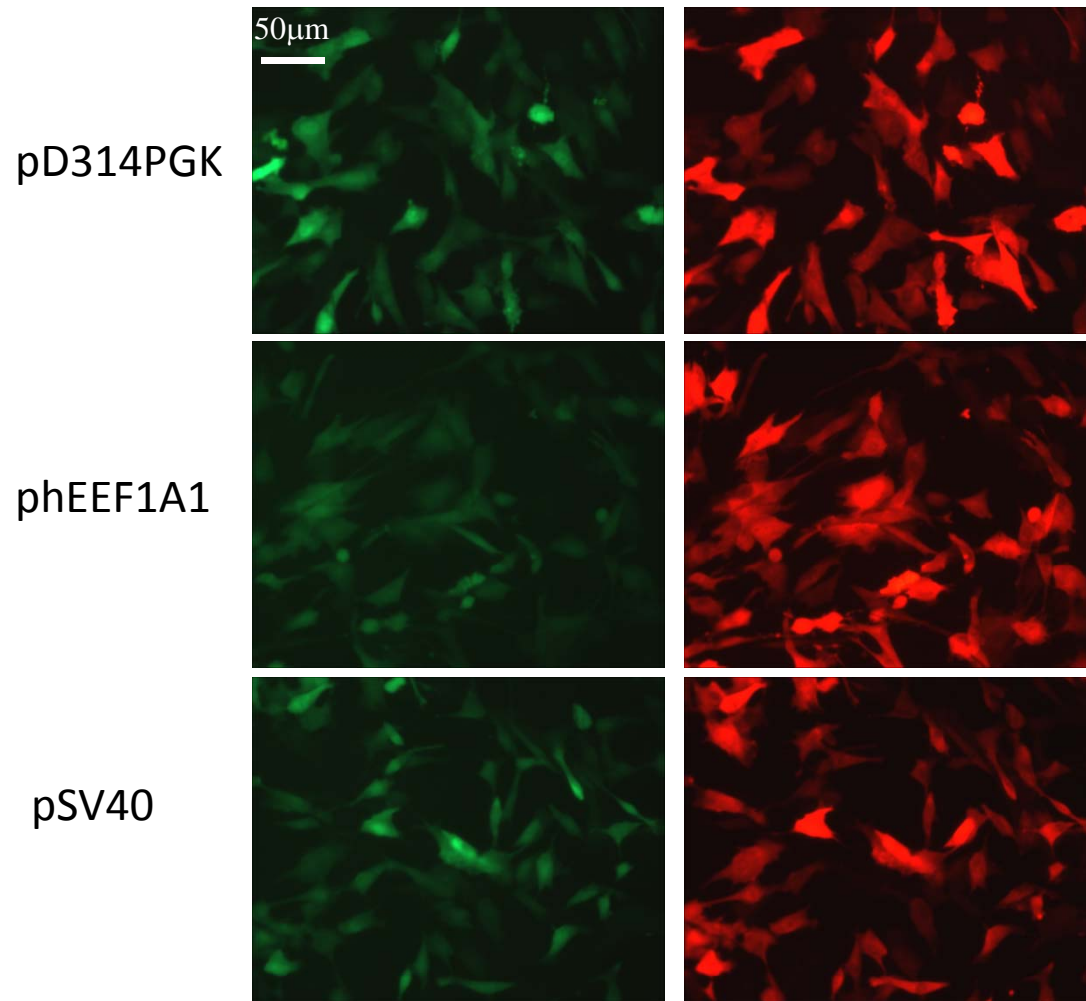

Fig.S4

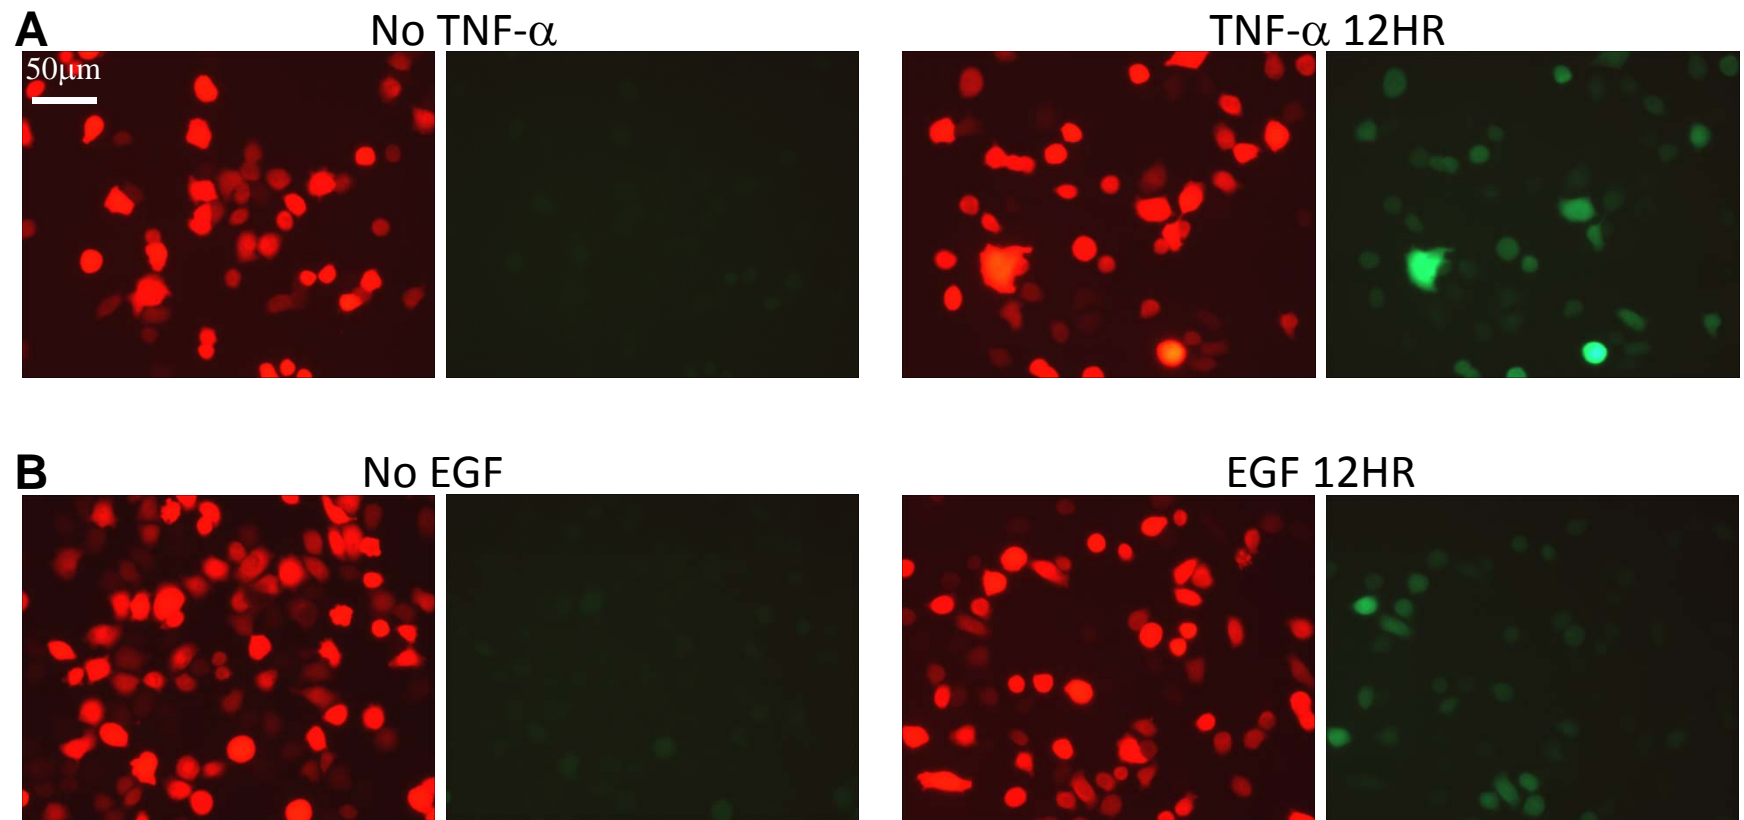

# Fig.S5

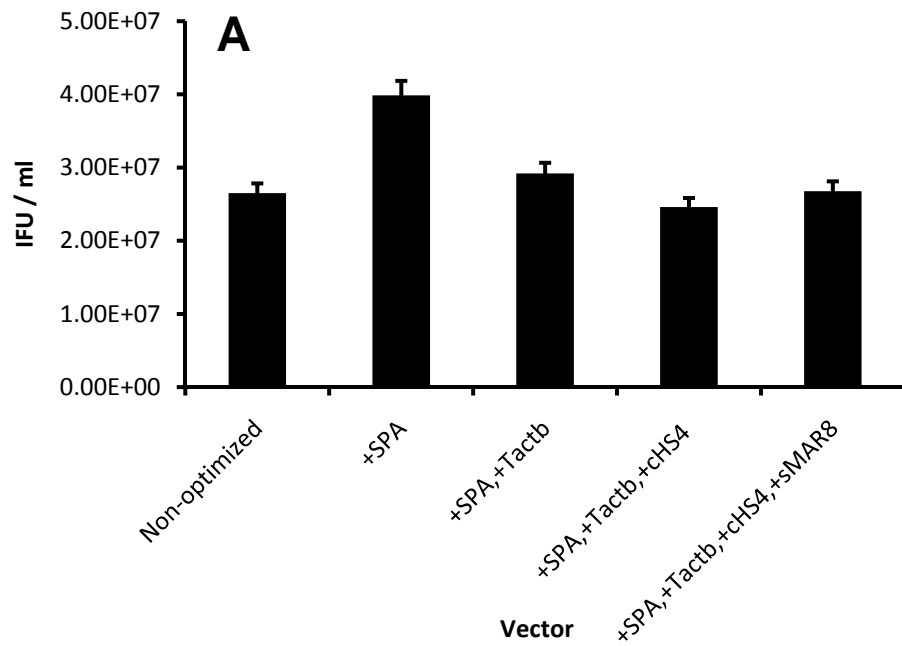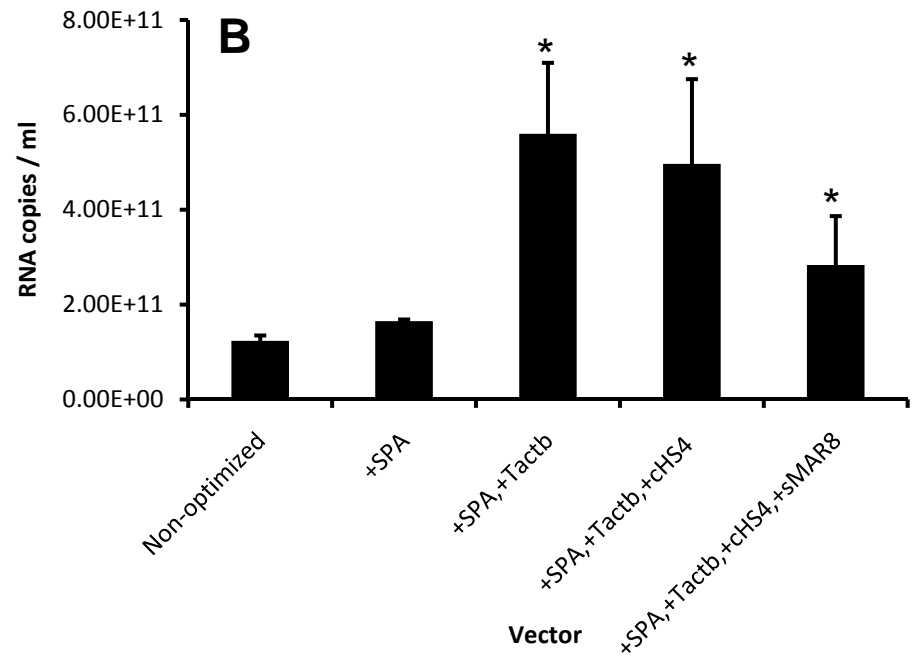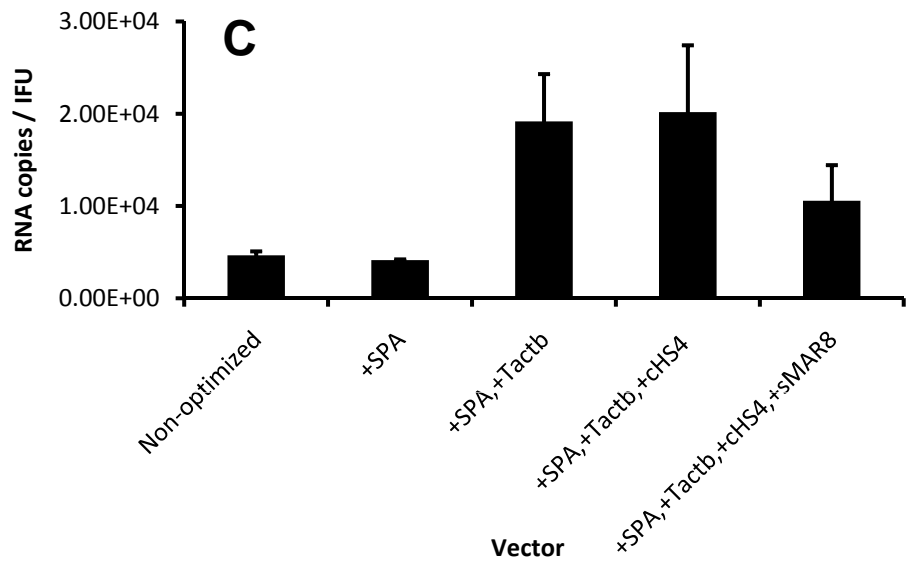

| Purpose                                                         | Vector # | Parental vector | Insert                             | Cloning sites | Primers/Oligos                                                                                                                                                                                                                                                              | Source of inserts          | Remarks                                                                                                                                                                                                                                                                              |
|-----------------------------------------------------------------|----------|-----------------|------------------------------------|---------------|-----------------------------------------------------------------------------------------------------------------------------------------------------------------------------------------------------------------------------------------------------------------------------|----------------------------|--------------------------------------------------------------------------------------------------------------------------------------------------------------------------------------------------------------------------------------------------------------------------------------|
| Parental vectors                                                | 1        | pCSCG           | pA and multiple cloning site (MCS) | BamHI, XhoI   | <b>pAMCSF</b> :TCGAAGAATTACCGGGAATCGATAACCGTAGGCGGCCAGGATCCACTCGAGAATGACGGCAATAAAAAGACAGATAAAAACCCACGGGTGTTGGGTCGTTTGTTCATAAACCGCGGA;<br><b>pAMCSR</b> :GATCTCCGGTTTATGAACAACACGCCAACACCCGTGGGTTTTATTCTGTCTTTTATTGCCGTCATTCTCGAGTGGATCTGGCGCGCTACC GGTTATCGATTCCGCGGTGAATCT | oligos                     | the oligoes were annealed and ligated into pCSCG to replace CMV-GFP segment in the original vector. After ligation, multiple cloning sites (EcoRI, SacI, ClaI, AgeI, AscI, BamHI, XhoI) and the core sequence of Herplex Simplex Virus (HSV) thymidine kinase polyA were introduced. |
|                                                                 | 2        | 1               | CMV_GFP                            | BamHI, XhoI   |                                                                                                                                                                                                                                                                             | subclone from pCSCG        | subclone                                                                                                                                                                                                                                                                             |
|                                                                 | 3        | 2               | DsRed2                             | NheI, XhoI    | NheI_DsRed2F:AACAACGCTAGCTCGCCACCATGGCCCTCCTC;<br>XhoI_DsRed2R:TGTTGTCTCGAGGGGGGAGGTGGGAGGTTT                                                                                                                                                                               | PCR from pDsRed2-1         | DsRed2 was amplified with PCR and cloned into vector 2 to replace GFP                                                                                                                                                                                                                |
|                                                                 | 4        | 3               | ZsG                                | BamHI, AgeI   | BamHI_ZsGR:TGGAGGGATCCTCTAGAAGTTAGGGCAAGCGGGA;<br>AgeI_ZsGF:ACAACAACCGGTATCCGCCACCATGGCCACGT                                                                                                                                                                                | PCR from pSIREN-RetroQ-ZsG | ZsG was amplified with PCR from pSIREN-RetroQ-ZsG vector and cloned into vector 3. Note that a cloning site XbaI was created upstream of BamHI                                                                                                                                       |
|                                                                 | 5        | 4               | phPGK                              | ClaI, AgeI    | <b>ClaI_hPGKF</b> :ACAACAATCGATAATTCACGGGTTGGGGTT;<br><b>AgeI_hPGKR</b> :TGTTGTACCGGTTACAGCTGGGGAGAGAGTTC                                                                                                                                                                   | PCR from hgDNA             | phPGK was amplified from hgDNA                                                                                                                                                                                                                                                       |
| Clone polyAs downstream of vector #5                            | 6        | 5               | hGHPA                              | XbaI, BamHI   | <b>XbaI_hGHPAF</b> :ACAACATCTAGACAGTCCGCTCTGTGGAGG;<br><b>BamHI_hGHPAR</b> :TGTTGTGGATCCGGCATGGCCAGGTAGCCTAT                                                                                                                                                                | PCR from hgDNA             | hGHPA was amplified from hgDNA                                                                                                                                                                                                                                                       |
|                                                                 | 7        | 5               | rGbpA                              | XbaI, BamHI   | <b>XbaI_rGbpAF</b> :ACATGTTCTAGAGGGCAACGTGCTGTTGTTG;<br><b>BamHI_rGbpAR</b> :TGTTGTGGATCCAGAGAAGAGGGACAGCTATG                                                                                                                                                               | PCR from pC4S1-FM4-FCS-hGH | rGbpA was amplified from vector pC4S1-FM4-FCS-hGH                                                                                                                                                                                                                                    |
|                                                                 | 8        | 5               | SPA                                | XbaI, BamHI   | <b>XbaI_SPAF</b> :CTAGCAATAAAAAGATCTTTATTTTCATTAGATCTGTGTGGTTTTTTGTGTCTAGAG;<br><b>BamHI_SPAR</b> :GATCCTCTAGACACAAAAACCAACACACAGATCTAATGAAAAATAAGATCTTTTATTG                                                                                                               | oligos                     | the oligoes of SPA were annealed and ligated into vector 5. Note that after ligation the original XbaI was lost and a new XbaI was created downstream of SPA for cloning other sequences.                                                                                            |
| Clone terminators/pause sites downstream of SPA using vector #8 | 9        | 8               | S                                  | XbaI, BamHI   | <b>BamHI_SF</b> :ACAACAGGATCCAGGCGTAAATGTAAGCGT;<br><b>XbaI_SR</b> :TGTTGGGATCCCCCTGAGCGGCGATTAAG                                                                                                                                                                           | PCR from pEGFP-1           | the spacer sequence was amplified by PCR from vector pEGFP-1                                                                                                                                                                                                                         |
|                                                                 | 10       | 8               | CoTC                               | XbaI, BamHI   | <b>XbaI_CoTCF</b> :ACAACATCTAGAATGTCCCTTATGGTGCTTCT;<br><b>BamHI_CoTCR</b> :ACAACAGGATCCGTGTTAATTAATTTGGCCTTTGCTCTCAT                                                                                                                                                       | PCR from hgDNA             | the CoTC sequence was amplified by PCR from hgDNA. Note a PacI site was created downstream of CoTC for cloning other sequences.                                                                                                                                                      |
|                                                                 | 11       | 8               | T <sub>actb</sub>                  | XbaI, BamHI   | <b>XbaI_T<sub>actb</sub>F</b> :ACAACATCTAGAGTGGGGCAGTGGGGCCAA;<br><b>BamHI_T<sub>actb</sub>R</b> :ACAACAGGATCCACATTAATTAAGTACAGCCAGTATCCATA                                                                                                                                 | PCR from hgDNA             | the CoTC sequence was amplified by PCR from hgDNA. Note a PacI site was created downstream of T <sub>actb</sub> for cloning other sequences.                                                                                                                                         |
|                                                                 | 12       | 8               | MAZ4                               | XbaI, BamHI   | <b>XbaI_MAZ4F</b> :CTAGAGCCTTGGGGAGGGGAGGCCAGAAGCCCTGGGGAGGGGAGGCCAGAAATTAATGTTG;<br><b>BamHI_MAZ4R</b> :GATCCACATTAATTAATTTGGCCTCCCTCCCTCCCAAGGCCTTGGCCTCCCTCCCTCCCAAGGGCT                                                                                                 | oligos                     | the oligoes for MAZ4 were annealed and ligated into vector 8. Note a PacI site was created downstream of MAZ4 for cloning other sequences.                                                                                                                                           |
|                                                                 | 13       | 8               | T <sub>msa</sub>                   | XbaI, BamHI   | <b>XbaI_T<sub>msa</sub>F</b> :ACAACATCTAGACTCCCTCTGTCGCCACACT;<br><b>BamHI_T<sub>msa</sub>R</b> :ACAACAGGATCCACATTAATTAACCTCTCAAAAACAGAGCTCACT                                                                                                                              | PCR from mouse gDNA        | the CoTC sequence was amplified by PCR from mouse gDNA. Note a PacI site was created downstream of T <sub>msa</sub> for cloning other sequences.                                                                                                                                     |
| Clone insulators downstream of Tactb using vector #11           | 14       | 11              | sMAR4                              | PacI, BamHI   | <b>PacI_sMAR4F</b> :GATCCACATTAATTAATTTCTAAATATATTAGAAATTAAGAATCTAAATATATTAGAAATTAAGATTCTAAATATATTAGAAATTAAGATTCTAAATATATTAGAAATTAAGAAAT;<br><b>BamHI_sMAR4R</b> :TCTTTAATTTCTAATATATTAGAATCTTTAATTTCTAATATATTAGAATCTTTAATTTCTAATATATTAGAATCTTTAATTTCTAATATATTAGAATTAATGTTG | oligos                     | the oligos of sMAR4 were annealed and ligated into vector 11. Note that after ligation the original PacI was lost and a new PacI was created downstream of sMAR4 for cloning other sequences.                                                                                        |
|                                                                 | 15       | 14              | sMAR8                              | PacI, BamHI   | <b>PacI_sMAR4F</b> :GATCCACATTAATTAATTTCTAAATATATTAGAAATTAAGAATCTAAATATATTAGAAATTAAGATTCTAAATATATTAGAAATTAAGAAAT;<br><b>BamHI_sMAR4R</b> :TCTTTAATTTCTAATATATTAGAATCTTTAATTTCTAATATATTAGAATCTTTAATTTCTAATATATTAGAATTAATGTTG                                                 | oligos                     | similar to cloning vector 14, another copy of sMAR4 was cloned.                                                                                                                                                                                                                      |
|                                                                 | 16       | 11              | cHS4                               | PacI, BamHI   | <b>PacI_cHS4F</b> :ACAACATTAATTAACCTTCCCGGGAGCTCACGG;<br><b>BamHI_cHS4R</b> :TGTTGGGATCCGTGACGCACCTGAACAGGTTG                                                                                                                                                               | PCR from chicken gDNA      | cHS4 sequence was amplified from chicken gDNA                                                                                                                                                                                                                                        |
|                                                                 | 17       | 15              | cHS4                               | PacI, BamHI   | <b>PacI_cHS4F</b> :ACAACATTAATTAACCTTCCCGGGAGCTCACGG;<br><b>BamHI_cHS4R</b> :TGTTGGGATCCGTGACGCACCTGAACAGGTTG                                                                                                                                                               | PCR from chicken gDNA      | cHS4 sequence was amplified from chicken gDNA                                                                                                                                                                                                                                        |
|                                                                 | 18       | pCSCG           | New MCS                            | BamHI, XhoI   | <b>NpAMCSF</b> :TCGAAGAATTACCTCGAGAATGACGGCAATAAAAAGACAGAAATAAACCCACGGGTGTTGGGTCGTTTGTTCATAAACCGGGAAGCGCTACGGTCCGAGTTAACA;<br><b>NpAMCSR</b> :GATCTGTTAACTCGGACCGTAGCGCTCCCGCTTTATGAACAAACGACCAACACCCGTGGGTTTATCTGTCTTTTATTGCCGTCATTCTGAGTGAATCT                            | oligos                     | After ligation, original BamHI and XhoI were. Note new MCS (AfeI, RsrII, XhoI, EcoRI, HpaI) and the same TKpA as in vector 1 were introduced.                                                                                                                                        |
|                                                                 | 19       | 18              | M9                                 | AfeI, RsrII   | <b>AfeI_M9F</b> :ATTTCATATAGAACAATGTAATTTCTTCTAGAGTTAAGCAGGGCTTTTATAAGCTGAAGCGCTACG;<br><b>RsrII_M9R</b> :GACCGTAGCGCTTACGTTATGAAAAAGCCCTGCTTAACCTTAGGAAAGAAITTACATITGTTCTATATGGAAT                                                                                         | oligos                     | oligos for M9 were annealed and ligated into vector 18                                                                                                                                                                                                                               |

|                                     |    |       |                                     |             |                                                                                                                                                                                                                                                                                         |                                       |                                                                                                                                                                                                        |
|-------------------------------------|----|-------|-------------------------------------|-------------|-----------------------------------------------------------------------------------------------------------------------------------------------------------------------------------------------------------------------------------------------------------------------------------------|---------------------------------------|--------------------------------------------------------------------------------------------------------------------------------------------------------------------------------------------------------|
| Clone insulators downstream of TKpA | 20 | 18    | m3'HS1                              | AfeI, RsrII | <b>AfeI_m3'HS1F:</b><br>TCATTTCTCTAATGATCCTGTTGCATACCAGTAGGGGGCAGAAGTGTCC<br>ACTGATTTCCGCCCTCCTCCAGCGCTACG;<br><b>RsrII_m3'HS1R:</b> GACCGTAGCGCTGGAGAGGAGGGCGGAAATCAGTGGAA<br>CACTTCTGCCCCCTACTGGTATGCAACAGGATCATTAGAGAAATGA                                                           | oligos                                | oligos for m3'HS1 were annealed and ligated into vector 18                                                                                                                                             |
|                                     | 21 | 18    | H19HS2                              | AfeI, RsrII | <b>RsrII_H19HS2F:</b> ACAACACCGTCCGCCAGCAGTGTGGCTCACTA;<br><b>AfeI_H19HS2R:</b> ACAACAAGCGTGTCTGCCGAGCAATATGTAG                                                                                                                                                                         | PCR from mouse gDNA                   | insulator H19HS2 was amplified from mouse gDNA                                                                                                                                                         |
|                                     | 22 | 19    | DsRed2_CMV_cHS4_Tactb_SPA_ZsG_phPGK | EcoRI, XhoI |                                                                                                                                                                                                                                                                                         | subclone from vector 16               | The insert DsRed2_CMV_cHS4_Tactb_SPA_ZsG_phPGK was cut from vector 16 and subcloned into vector 19                                                                                                     |
|                                     | 23 | 20    | DsRed2_CMV_cHS4_Tactb_SPA_ZsG_phPGK | EcoRI, XhoI |                                                                                                                                                                                                                                                                                         | subclone from vector 16               | The insert DsRed2_CMV_cHS4_Tactb_SPA_ZsG_phPGK was cut from vector 16 and subcloned into vector 20                                                                                                     |
|                                     | 24 | 21    | DsRed2_CMV_cHS4_Tactb_SPA_ZsG_phPGK | EcoRI, XhoI |                                                                                                                                                                                                                                                                                         | subclone from vector 16               | The insert DsRed2_CMV_cHS4_Tactb_SPA_ZsG_phPGK was cut from vector 16 and subcloned into vector 21                                                                                                     |
|                                     | 25 | pCSCG | sMAR4                               | BamHI, XhoI | <b>XhoI_sMAR4F:</b> TCGAGTGTGGATCCTTCTAAATATATTAGAATTAAGAT<br>TCTAAATATATTAGAAATTAAGATCTAAATATATTAGAAATTAAGAT<br>CTAAATATATTAGAAATTAAGAT;<br><b>BamHI_sMAR4R:</b> GATCATCTTTAATTCTAATATATTAGAATCTTTAATT<br>CTAATATATTAGAAATCTTTAATTCTAATATATTAGAAATCTTTAATTCT<br>AATATATTAGAAAGATCCACAC | oligos                                | The oligos for sMAR4 were annealed and ligated into pCSCG to replace CMV-GFP segment in the original vector. After ligation, the original BamHI was lost but a new BamHI was created upstream of sMAR4 |
|                                     | 26 | 25    | sMAR4                               | BamHI, XhoI |                                                                                                                                                                                                                                                                                         | same oligos as used in vector 25      | similar to cloning vector 25, another copy of sMAR4 was cloned.                                                                                                                                        |
|                                     | 27 | 26    | New MCS                             | BamHI, XhoI |                                                                                                                                                                                                                                                                                         | same oligos as used in vector 1       | similar to cloning vector 1, HSV TKpA together with multiple cloning sites was cloned.                                                                                                                 |
|                                     | 28 | 27    | DsRed2_CMV_cHS4_Tactb_SPA_ZsG_phPGK | EcoRI, XhoI |                                                                                                                                                                                                                                                                                         | subclone from vector 16               | The insert DsRed2_CMV_cHS4_Tactb_SPA_ZsG_phPGK was cut from vector 16 and subcloned into vector 27                                                                                                     |
| Use EGFP to replace ZsGreen         | 29 | 28    | SPA-EGFP                            | AgeI, XbaI  | <b>AgeI_EGFP_SPAF:</b> ACAACACTCTAGACACACAAAAACACACAGAT<br>CTAATGAAAATAAAGATCTTTATTGCTACCGCTTACTTGTACAGCTC;<br><b>XbaI_EGFP_SPAR:</b> ACAACACTCTAGACCGCTTACTTGTACAGCTC                                                                                                                  | PCR from pEGFP-1                      | EGFP was amplified from pEGFP-1 with primer containing SPA and cloned into vector 29 to replace ZsG-SPA                                                                                                |
| Clone promoters in place of PGK     | 30 | 27    | DsRed2_CMV_cHS4_Tactb_SPA_EGFP      | XhoI, AgeI  |                                                                                                                                                                                                                                                                                         | subclone from vector 29               | The insert DsRed2_CMV_cHS4_Tactb_SPA_EGFP was cut from vector 29 and subcloned into vector 27                                                                                                          |
|                                     | 31 | 30    | phEEF1A1                            | EcoRI, ClaI | <b>EcoRI_hEEF1A1F:</b> ACAACAGAATTCGGAGAAGAGCATCGGTGAGG<br><b>ClaI_hEEF1A1R:</b> ACAACAATCGATAGGGGTAGTTTTACAGACAC                                                                                                                                                                       | PCR from hgDNA                        | phEEF1A1 was amplified from hgDNA                                                                                                                                                                      |
|                                     | 32 | 30    | phD314PGK                           | ClaI, AgeI  | <b>ClaI_hd314PGKF:</b> ACAACAATCGATTGGCTGTGGCCAATAGCGG;<br><b>AgeI_hpGKR:</b> TGTTGTACCGGTTACAGCTGGGAGAGAGGTC                                                                                                                                                                           | PCR from hgDNA                        | phD314PGK was amplified from hgDNA                                                                                                                                                                     |
|                                     | 33 | 30    | pSV40                               | EcoRI, AgeI | <b>EcoRI_pSV40F:</b> ACAACAGAATTCCTGAGGCGGAAAGAACCCAGC;<br><b>AgeI_pSV40R:</b> TGTTGTACCGGTCGATCCTCATCTGTCTCTT                                                                                                                                                                          | PCR from pd2EGFP-1                    | pSV40 was amplified from pEGFP-1                                                                                                                                                                       |
|                                     | 34 | 30    | pACTA2                              | ClaI, AgeI  | <b>ClaI_ACTA2F:</b> ACAACAATCGATAACAGCTGGTCAATGGTGTGA;<br><b>AgeI_ACTA2R:</b> TGTTGTACCGGTCGATGAACCCAGCCAAATCC                                                                                                                                                                          | PCR from hgDNA                        | pACTA2 was amplified from hgDNA                                                                                                                                                                        |
| use d2EGFP to replace EGFP          | 35 | 30    | SPA-d2EGFP                          | AgeI, XbaI  | <b>AgeI_d2EGFP:</b> ACAACAACCGGTGGTCCACCATTGGTGAGCA;<br><b>XbaI_SPA_d2EGFP:</b> ACAACATCTAGACACACAAAAACACACAGAT<br>CTAATGAAAATAAAGATCTTTATTGCTAGAGCCATCTACACATTGATC                                                                                                                     | PCR from pd2EGFP-1                    | SPA-d2EGFP was amplified from pd2EGFP-1 with primer containing SPA and cloned into vector 30 to replace EGFP-SPA                                                                                       |
| Clone response elements             | 36 | 35    | RE-NFKB                             | ClaI, AgeI  |                                                                                                                                                                                                                                                                                         | subclone from pRE-NFKB_CMVmini_d2EGFP | RE-NFKB together with CMV <sub>mini</sub> was cut from vector pRE-NFKB_CMV <sub>mini</sub> _d2EGFP and cloned into vector 35                                                                           |
|                                     | 37 | 35    | RE-API                              | ClaI, AgeI  |                                                                                                                                                                                                                                                                                         | subclone from pRE-API_CMVmini_d2EGFP  | RE-NFKB together with CMV <sub>mini</sub> was cut from vector pRE-API_CMV <sub>mini</sub> _d2EGFP and cloned into vector 35                                                                            |

Note: all genomic DNA used was obtained from EMD (Gibbstown, NJ)
